# Supplementary material
Source: MDPI journal article supplement (https://www.mdpi.com/2073-445X/11/2/159)
Supplement: s1 [file s1]

## Supplementary Materials

**Table S1: List of 18 publications considered in the review.**

8. Baudoin, M.-A.; Vogel, C.; Nortje, K.; Naik, M. Living with drought in South Africa: lessons learnt from the recent El Niño drought period. *Int. J. Disaster Risk Reduct.* 2017, 23, 128-137.
16. Swemmer, A.M.; Bond, W.J.; Donaldson, J.; Hempson, G.P.; Malherbe, J.; Smit, I.P.J. The ecology of drought - a workshop report. *S. Afr. J. Sci.* 2018, 114(9-10),1-3.
35. Lottering, S.J.; Mafongoya, P.; Lottering, R. The impacts of drought and the adaptive strategies of small-scale farmers in uMsinga, KwaZulu-Natal, South Africa. *J. Asian Afr. Stud.* 2021, 56(2), 267-289.
44. Mpandeli, S.; Nesamvuni, E.; Maponya P. Adapting to the impacts of drought by smallholder farmers in Sekhukhune District in Limpopo Province, South Africa. 2015, *J. Agri. Sci.* 7, 110.
45. Vetter, S.; Goodall, V.; Alcock, R. Effect of drought on communal livestock farmers in KwaZulu-Natal, South Africa. *Afr. J. Range Forage Sci.* 2020, 37(1), 93-106.
49. Bahta, Y.T. Smallholder livestock farmers coping and adaptation strategies to agricultural drought. *AIMS Agric. Food.* 2020, 5(4), 964-982.
50. Rakgwale, T.J.; Oguttu, J.W. The impact of the 2014–2016 drought in Greater Letaba Local Municipality: How the farmers coped and factors that were significantly associated with loss of animals. *Int. J. Disaster Risk Reduct.* 2020, 50, 101869.
51. Bahta, Y.T.; Jordaan, A.; Muyambo, F. Communal farmers' perception of drought in South Africa: Policy implication for drought risk reduction. *Int. J. Disaster Risk Reduct.* 2016, 20, 39-50.
52. Kom, Z.; Nethengwe, N.S.; Mpandeli, N.S.; Chikoore, H. Determinants of small-scale farmers' choice and adaptive strategies in response to climatic shocks in Vhembe District, South Africa. *GeoJournal*, 2020, 85, 1-24.
53. Ngaka, M.J. Drought preparedness, impact and response : a case of the Eastern Cape and Free State provinces of South Africa : original research. *Jàmbá - J. disaster risk stud.* 2012, 4(1), 1-10.
54. Matlou, R.; Bahta, Y.T.; Owusu-Sekyere, E.; Jordaan, H. Impact of agricultural drought resilience on the welfare of smallholder livestock farming households in the Northern Cape Province of South Africa. *Land* 2021, 10(6), 562.
56. Jordaan, A.; Bahta, Y.T.; Phatudi-Mphahlele, B. Ecological vulnerability indicators to drought: Case of communal farmers in Eastern Cape, South Africa. *Jàmbá - J. disaster risk stud.* 2019, 11(1), a591.
57. Maponya, P.; Mpandeli, S. Climate change and agricultural production in South Africa: Impacts and Adaptation options. *J. Agri. Sci.* 2012, 4, 48.
58. Jordaan, A.J.; Sakulski, D.; Jordaan, A.D. Interdisciplinary drought risk assessment for agriculture: The case of communal farmers in the Northern Cape Province, South Africa. *S. Afr. J. Agric. Ext.* 2013, 41, 44-58.
61. Vilakazi, B.S.; Zengeni, R.; Mafongoya, P. Indigenous strategies used by selected farming communities in KwaZulu Natal, South Africa, to manage soil, water, and climate extremes and to make weather predictions. *Land Degrad. Dev.* 2019, 30(16), 1999-2008.
62. Makaya, E.; Rohse, M.; Day, R.; Vogel, C.; Mehta, L.; McEwen, L.; Rangelcroft, S.; Van Loon, A.F. Water governance challenges in rural South Africa: exploring institutional coordination in drought management. *Water Policy* 2020, 22, 519-540.
63. Muthelo, D.; Owusu-Sekyere, E.; Ogundeji, A.A. Smallholder farmers' adaptation to drought: Identifying effective adaptive strategies and measures. *Water*, 2019, 11, 2069.
64. Muyambo, F.; Jordaan, A.J.; Bahta, Y.T. Assessing social vulnerability to drought in South Africa: Policy implication for drought risk reduction. *Jàmbá - J. disaster risk stud.* 2017, 9(1), a326.
